# Supplementary material
Source: publisher site journal article supplement (https://www.spandidos-publications.com/8170/downloadSupplementary)
Supplement: Supplementary file 1 [file downloadSupplementary]

## Sheet: Sheet1
Table SII. Marker genes for cell cluster identification in single-cell RNA sequencing.
Cluster ID	Cell type	Markers
1	B cells	Cd79a,Cd79b,Ighm,Cd27,Cd19,Ms4a1,Cd74,Igkc, Dntt,Blnk
2	B cells	Cd79a,Cd79b,Ighm,Cd27,Cd19,Ms4a1,Cd74,Igkc, Dntt,Blnk
3	T cells	Cd3d,Cd8a,Slc4a10,Rorc,Itgae,Itgal,Cd4,Tnfrsf4, Cd40lg,Tnf,Trdc,Cd3e,Cd3g,Cd2,Lat,Ets1,KIrd1, Nkg7,Ncr1,Ccr7,Lef1,Sell,Tcf7,I7r,Foxp3,II2ra,Ctla4, lkzf2,Dusp4,Cxcr6,Gzma,Lag3,Tigit,Prf1,Pdcd1
4	T cells	Cd3d,Cd8a,Slc4a10,Rorc,Itgae,Itgal,Cd4,Tnfrsf4, Cd40lg,Tnf,Trdc,Cd3e,Cd3g,Cd2,Lat,Ets1,KIrd1, Nkg7,Ncr1,Ccr7,Lef1,Sell,Tcf7,I7r,Foxp3,II2ra,Ctla4, Ikzf2,Dusp4,Cxcr6,Gzma,Lag3,Tigit,Prfl,Pdcd1
5	Neutrophils	Camp,GOs2,Csf3r,S100a8,Ccrl2
6	Mononuclear phagocytes	Xcr1,Clec9a,Ccr7,Irf8,Batf3,FIt3,Mrcl,Cd163,Tgfb1, I110,Fn1,Fcerla,Nr4a3,Gm2a,Thbd,Nudt17,Fscn1, Ccl22,Ccl17,Cd14,Clqc,Aif1,Stmn1,ltgax,Olr1,Sell, Ccr2,Cx3cr1,Ace,Eno3,Apoe,Clqa,Clqb,Marco,Msr1, Il1b,II6,Tnf,Adgre1,Plac8,Cd80,Ms4a7,Kmo,ldol, Mafb,Cfp,Fabp4,Trem2,Fcnb,Vcan,Gngt2,Fgl2,NIrp3, Cd300e,Csflr,Tgfbi,Ereg,Lgals2,Plbd1,Cdkn1c,Tcf712, Cd276,Mmp19,F13a1,Gpr34,Sppl,Mmp9,Fcerlg, Acp5,Apocl
7	Plasmacytoid dendritic cells	Ccr9,Tcf4,Irf7,Cox6a2,TIr7,Irf4,Bcllla
8	Mononuclear phagocytes	Xcr1,Clec9a,Ccr7,Irf8,Batf3,Flt3,Mrc1,Cd163,Tgfb1, Il10,Fnl,Fcerla,Nr4a3,Gm2a,Thbd,Nudt17,Fscn1, Ccl22,Ccl17,Cd14,Clqc,Aif1,Stmn1,ltgax,Olr1,Sell, Ccr2,Cx3cr1,Ace,Eno3,Apoe,Clqa,Clqb,Marco,Msr1, Il1b,I6,Tnf,Adgre1,Plac8,Cd80,Ms4a7,Kmo,Idol, Mafb,Cfp,Fabp4,Trem2,Fcnb,Vcan,Gngt2,Fgl2,NIrp3, Cd300e,Csfl1r,Tgfbi,Ereg,Lgals2,Plbd1,Cdkn1c,Tcf712, Cd276,Mmp19,F13a1,Gpr34,Spp1,Mmp9,Fcerlg, Acp5,Apocl
9	Endothelial cells	Pecam1,Vwf,Cldn5,Cdh5,Sema3a,Prox1,Pdpn,Plvap, Lyvel,Emcn,Mmrn1
10	Mononuclear phagocytes	Xcr1,Clec9a,Ccr7,Irf8,Batf3,Flt3,Mrc1,Cd163,Tgfb1, Il10,Fn1,Fcerla,Nr4a3,Gm2a,Thbd,Nudt17,Fscn1, Ccl22,Ccl17,Cd14,Clqc,Aif1,Stmn1,Itgax,Olr1,Sell, Ccr2,Cx3cr1,Ace,Eno3,Apoe,Clqa,Clqb,Marco,Msrl, Il1b,II6,Tnf,Adgrel,Plac8,Cd80,Ms4a7,Kmo,Idol, Mafb,Cfp,Fabp4,Trem2,Fcnb,Vcan,Gngt2,Fgl2,NIrp3, Cd300e,Csflr,Tgfbi,Ereg,Lgals2,Plbd1,Cdkn1c,Tcf712, Cd276,Mmp19,F13a1,Gpr34,Spp1,Mmp9,Fcerlg, Acp5,Apocl
11	Mononuclear phagocytes	Xcr1,Clec9a,Ccr7,Irf8,Batf3,Flt3,Mrcl,Cd163,Tgfb1, Il10,Fn1,Fcerla,Nr4a3,Gm2a,Thbd,Nudt17,Fscn1, Ccl22,Ccl17,Cd14,Clqc,Aifl,Stmn1,ltgax,Olr1,Sell, Ccr2,Cx3cr1,Ace,Eno3,Apoe,Clqa,Clqb,Marco,Msr1, Il1b,II6,Tnf,Adgre1,Plac8,Cd80,Ms4a7,Kmo,Idol, Mafb,Cfp,Fabp4,Trem2,Fcnb,Vcan,Gngt2,Fgl2,NIrp3, Cd300e,Csflr,Tgfbi,Ereg,Lgals2,PIbd1,Cdknlc,Tcf712, Cd276,Mmp19,F13a1,Gpr34,Spp1,Mmp9,Fcer1g, AcD5.Adocl
12	Mononuclear phagocytes	Xcr1,Clec9a,Ccr7,Irf8,Batf3,Flt3,Mrc1,Cd163,Tgfb1, Il10,Fn1,Fcerla,Nr4a3,Gm2a,Thbd,Nudt17,Fscn1, Ccl22,Ccl17,Cd14,Clqc,Aifl,Stmn1,Itgax,Olr1,Sell, Ccr2,Cx3cr1,Ace,Eno3,Apoe,Clqa,Clqb,Marco,Msr1, Il1b,II6,Tnf,Adgrel,Plac8,Cd80,Ms4a7,Kmo,Idol, Mafb,Cfp,Fabp4,Trem2,Fcnb,Vcan,Gngt2,Fgl2,NIrp3, Cd300e,Csflr,Tgfbi,Ereg,Lgals2,Plbd1,Cdkn1c,Tcf712, Cd276,Mmp19,F13a1,Gpr34,Spp1,Mmp9,Fcerlg, Acp5,Apocl
13	Mononuclear phagocytes	Xcr1,Clec9a,Ccr7,Irf8,Batf3,Flt3,Mrc1,Cd163,Tgfb1, Il10,Fn1,Fcerla,Nr4a3,Gm2a,Thbd,Nudt17,Fscn1, Ccl22,Ccl17,Cd14,Clqc,Aifl,Stmnl,Itgax,Olr1,Sell, Ccr2,Cx3cr1,Ace,Eno3,Apoe,Clqa,Clqb,Marco,Msr1, Il1b,II6,Tnf,Adgrel,Plac8,Cd80,Ms4a7,Kmo,Idol, Mafb,Cfp,Fabp4,Trem2,Fcnb,Vcan,Gngt2,Fgl2,NIrp3, Cd300e,Csf1r,Tgfbi,Ereg,Lgals2,Plbd1,Cdkn1c,Tcf712, Cd276,Mmp19,F13a1,Gpr34,Spp1,Mmp9,Fcerlg, Acp5,Apocl
14	Endothelial cells	Pecam1,Vwf,Cldn5,Cdh5,Sema3a,Prox1,Pdpn,Plvap, Lyvel,Emcn,Mmrn1
15	Epithelial cells	Cdh2,Snai2,Zeb1,Krt8,Krt18,Krt19,Epcam,Itgb4, Itga6,Sfn,Muc4,Muc16,Tacstd2,Krt80,Krt16,Krt17, Krt23,Cldn4,Trp63,Krt78,Cldn18,Emp2,Tspan8,Cdh1, Aqp4,Krt4,Lamc2,Wfdc2,Anxa1,Upk3b,Upk1b, Gpm6a,Nkain4,Lrrn4,Wt1,Lamb1,Scgb3a2,Scgbla1, Scgb3a1,Slpi,Pigr,Clca2,Krt5,Krt14,Krt15,Lamb3, Aldh3a1,Dsc3,Cldn1,Lama3,Foxjl,Pifo,Tppp3,Cfap43, Dnah3,Dnah5,Dnah9,Agbl4,Fam183b,Tspan1, Ccdc153,Ccdc113,Ccdc78,Tmem190,…
16	Mononuclear phagocytes	Xcr1,Clec9a,Ccr7,Irf8,Batf3,Flt3,Mrcl,Cd163,Tgfb1, I110,Fn1,Fcerla,Nr4a3,Gm2a,Thbd,Nudt17,Fscn1, Ccl22,Ccl17,Cd14,Clqc,Aif1,Stmn1,Itgax,Olr1,Sell, Ccr2,Cx3cr1,Ace,Eno3,Apoe,Clqa,Clqb,Marco,Msr1, Il1b,I6,Tnf,Adgrel,Plac8,Cd80,Ms4a7,Kmo,ldol, Mafb,Cfp,Fabp4,Trem2,Fcnb,Vcan,Gngt2,Fgl2,NIrp3, Cd300e,Csflr,Tgfbi,Ereg,Lgals2,Plbd1,Cdknlc,Tcf712, Cd276,Mmp19,F13a1,Gpr34,Sppl,Mmp9,Fcer1lg, Acp5,Apocl
17	Fibroblasts	Dcn,Lum,Colla1,Colla2,Mgp,Col3a1,Prg4,Serpinf1, Gpc3,Pdgfra,Plin2,Bgn,Col15a1,Cxcl14,Tnc,Postn, Col5a1,Col6a3,Mfap5,Cdh11,Fbln1,Ccdc80,Dkk3
18	Endothelial cells	Pecaml,Vwf,Cldn5,Cdh5,Sema3a,Prox1,Pdpn,Plvap, Lyvel,Emcn,Mmrn1
19	Epithelial cells	Cdh2,Snai2,Zeb1,Krt8,Krt18,Krt19,Epcam,Itgb4, Itga6,Sfn,Muc4,Muc16,Tacstd2,Krt80,Krt16,Krt17, Krt23,Cldn4,Trp63,Krt78,Cldn18,Emp2,Tspan8,Cdh1, Aqp4,Krt4,Lamc2,Wfdc2,Anxa1,Upk3b,Upk1b, Gpm6a,Nkain4,Lrrn4,Wt1,Lamb1,Scgb3a2,Scgbla1, Scgb3a1,Slpi,Pigr,Clca2,Krt5,Krt14,Krt15,Lamb3, Aldh3a1,Dsc3,Cldn1,Lama3,Foxjl,Pifo,Tppp3,Cfap43, Dnah3,Dnah5,Dnah9,Agbl4,Fam183b,Tspan1, Ccdc153,Ccdc113,Ccdc78,Tmem190,…
20	Fibroblasts	Dcn,Lum,Colla1,Colla2,Mgp,Col3a1,Prg4,Serpinf1, Gpc3,Pdgfra,Plin2,Bgn,Col15a1,Cxcl14,Tnc,Postn, Col5a1,Col6a3,Mfap5,Cdh11,Fbln1,Ccdc80,Dkk3
21	Epithelial cells	Cdh2,Snai2,Zeb1,Krt8,Krt18,Krt19,Epcam,Itgb4, Itga6,Sfn,Muc4,Muc16,Tacstd2,Krt80,Krt16,Krt17, Krt23,Cldn4,Trp63,Krt78,Cldn18,Emp2,Tspan8,Cdh1, Aqp4,Krt4,Lamc2,Wfdc2,Anxa1,Upk3b,Upk1b, Gpm6a,Nkain4,Lrrn4,Wt1,Lamb1,Scgb3a2,Scgbla1, Scgb3a1,Slpi,Pigr,Clca2,Krt5,Krt14,Krt15,Lamb3, Aldh3a1,Dsc3,Cldn1,Lama3,Foxjl,Pifo,Tppp3,Cfap43, Dnah3,Dnah5,Dnah9,Agbl4,Fam183b,Tspan1, Ccdc153,Ccdc113,Ccdc78,Tmem190,…
22	Mononuclear phagocytes	Xcr1,Clec9a,Ccr7,Irf8,Batf3,Flt3,Mrc1,Cd163,Tgfb1, Il10,Fn1,Fcerla,Nr4a3,Gm2a,Thbd,Nudt17,Fscn1, Ccl22,Ccl17,Cd14,Clqc,Aif1,Stmnl,Itgax,Olr1,Sell, Ccr2,Cx3cr1,Ace,Eno3,Apoe,Clqa,Clqb,Marco,Msr1, Il1b,II6,Tnf,Adgrel,Plac8,Cd80,Ms4a7,Kmo,Idol, Mafb,Cfp,Fabp4,Trem2,Fcnb,Vcan,Gngt2,Fgl2,NIrp3, Cd300e,Csf1r,Tgfbi,Ereg,Lgals2,Plbd1,Cdknlc,Tcf712, Cd276,Mmp19,F13a1,Gpr34,Spp1,Mmp9,Fcerlg, Acp5,Apocl
23	Mural cells	Acta2,Tagln,Mylk,Myl9,Rgs5,Mcam,Pdgfrb,Notch3, Myhll
24	T cells	Cd3d,Cd8a,Slc4a10,Rorc,Itgae,Itga1,Cd4,Tnfrsf4, Cd40lg,Tnf,Trdc,Cd3e,Cd3g,Cd2,Lat,Ets1,Klrd1, Nkg7,Ncr1,Ccr7,Lef1,Sell,Tcf7,II7r,Foxp3,II2ra,Ctla4, Ikzf2,Dusp4,Cxcr6,Gzma,Lag3,Tigit,Prfl,Pdcdl
25	Mast cells	Cpa3,Cmal,Fcerla,Il1rl1,Kit,Hpgds
26	Epithelial cells	Cdh2,Snai2,Zeb1,Krt8,Krt18,Krt19,Epcam,Itgb4, Itga6,Sfn,Muc4,Muc16,Tacstd2,Krt80,Krt16,Krt17, Krt23,Cldn4,Trp63,Krt78,Cldn18,Emp2,Tspan8,Cdh1, Aqp4,Krt4,Lamc2,Wfdc2,Anxa1,Upk3b,Upk1b, Gpm6a,Nkain4,Lrrn4,Wt1,Lamb1,Scgb3a2,Scgbla1, Scgb3a1,Slpi,Pigr,Clca2,Krt5,Krt14,Krt15,Lamb3, Aldh3a1,Dsc3,Cldn1,Lama3,Foxj1,Pifo,Tppp3,Cfap43, Dnah3,Dnah5,Dnah9,Agbl4,Fam183b,Tspan1, Ccdc153,Ccdc113,Ccdc78,Tmem190,…
27	B cells	Cd79a,Cd79b,Ighm,Cd27,Cd19,Ms4a1,Cd74,Igkc, Dntt,Blnk
28	Epithelial cells	Cdh2,Snai2,Zeb1,Krt8,Krt18,Krt19,Epcam,Itgb4, Itga6,Sfn,Muc4,Muc16,Tacstd2,Krt80,Krt16,Krt17, Krt23,Cldn4,Trp63,Krt78,Cldn18,Emp2,Tspan8,Cdh1, Aqp4,Krt4,Lamc2,Wfdc2,Anxa1,Upk3b,Upk1b, Gpm6a,Nkain4,Lrrn4,Wt1,Lamb1,Scgb3a2,Scgbla1, Scgb3a1,Slpi,Pigr,Clca2,Krt5,Krt14,Krt15,Lamb3, Aldh3a1,Dsc3,Cldn1,Lama3,Foxjl,Pifo,Tppp3,Cfap43, Dnah3,Dnah5,Dnah9,Agbl4,Fam183b,Tspan1, Ccdc153,Ccdc113,Ccdc78,Tmem190,…
29	Neutrophils	Camp,GOs2,Csf3r,S100a8,Ccrl2
30	Mononuclear phagocytes	Xcr1,Clec9a,Ccr7,Irf8,Batf3,Flt3,Mrc1,Cd163,Tgfb1, Il10,Fn1,Fcerla,Nr4a3,Gm2a,Thbd,Nudt17,Fscn1, Ccl22,Ccl17,Cd14,Clqc,Aif1,Stmn1,ltgax,Olr1,Sell, Ccr2,Cx3cr1,Ace,Eno3,Apoe,Clqa,Clqb,Marco,Msr1, II1b,II6,Tnf,Adgrel,Plac8,Cd80,Ms4a7,Kmo,Idol, Mafb,Cfp,Fabp4,Trem2,Fcnb,Vcan,Gngt2,Fgl2,NIrp3, Cd300e,Csflr,Tgfbi,Ereg,Lgals2,PIbd1,Cdknlc,Tcf712, Cd276,Mmp19,F13a1,Gpr34,Spp1,Mmp9,Fcerlg, Acp5,Apocl
31	Plasmacytoid dendritic cells	Ccr9,Tcf4,Irf7,Cox6a2,TIr7,Irf4,Bcllla
32	Neutrophils	Camp,GOs2,Csf3r,S100a8,Ccrl2
